# Supplementary material for: Fibromyalgia and Depression in Women: An 1H-NMR Metabolomic Study
Source: MDPI journal article supplement (doi:10.3390/metabo11070429), 2021-06-30
Supplement: s1 [file s1]

Supplementary Materials

# Fibromyalgia and Depression in Women: an $^1\text{H}$ -NMR Metabolomic Study

Carmen Marino <sup>1,†</sup>, Manuela Grimaldi <sup>1,†</sup>, Paola Sabatini <sup>2</sup>, Patrizia Amato <sup>3</sup>, Arianna Pallavicino <sup>1</sup> and Carmen Ricciardelli <sup>1</sup> Anna Maria D'Ursi <sup>1,\*</sup>

<sup>1</sup> Department of Pharmacy, University of Salerno, Via Giovanni Paolo II, 84084 Fisciano, Italy; cmarino@unisa.it (C.M.); magrimaldi@unisa.it (M.G.); carmen.ricciardelli@gmail.com (C.R); ariannapallavicinogmail.com (A.R)

<sup>2</sup> U.O.C. Clinical Pathology D.E.A. III Umberto I, Nocera Inferiore, Italy; paola.sabatini1@gmail.com

<sup>3</sup> Ser.T, Cava dei Tirreni ASLItaly; patriziaamato277@gmail.com

\* Correspondence: dursi@unisa.it

† These authors contributed equally to this work.

**Citation:** Marino, C.; Grimaldi, M.; Sabatini, P.; Amato, P.; Pallavicino, A.; Ricciardelli, C.; D'Ursi, A.M.

Fibromyalgia and Depression in Women: An  $^1\text{H}$ -NMR Metabolomic Study. *Metabolites* **2021**, *11*, 429.

<https://doi.org/10.3390/metabo11070429>

Academic Editor: Ilaria Campesi and Margherita Ruoppolo

Received: 3 May 2021

Accepted: 23 June 2021

Published: 30 June 2021

**Publisher's Note:** MDPI stays neutral with regard to jurisdictional claims in published maps and institutional affiliations.

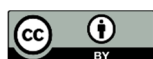

**Copyright:** © 2021 by the authors. Licensee MDPI, Basel, Switzerland. This article is an open access article distributed under the terms and conditions of the Creative Commons Attribution (CC BY) license (<http://creativecommons.org/licenses/by/4.0/>).

## Table of contents:

**Table S1.** Important features identified by Fold Change and logarithmic Fold Change ( $\log_2(\text{FC})$ ) parameters calculated.

**Table S2.** Important features identified by t-tests values, p-values (Threshold  $<0.05$ ), logarithmic p-values and False Discovery Rate (FDR) parameters calculated for the most statistically significant compounds.

**Table S3.** PLS-DA classification of the five different components (comps) based on accuracy,  $R^2$ ,  $Q^2$  related to MVA analysis between fibromyalgic patient and controls derived by NMR analysis.

**Table S4.** PLS-DA classification of the five different components (comps) based on accuracy,  $R^2$ ,  $Q^2$  related to MVA analysis between healthy controls, patients with moderate depression and patients with severe depression

**Figure S1.** ROC curve of biomarker. The sensitivity is on the y-axis, and the specificity is on the x-axis. The area-under-the-curve (AUC) is in blue. On the right: Box-plot of the concentrations of the selected feature between controls (0) and fibromyalgic patients (1) within the dataset. A horizontal line is in red indicating the optimal cutoff.

**Figure S2.** PLS-DA score plot (a) and loading plot (b) for  $^1\text{H}$  NMR data collected in CPMG spectra using 19 controls (0, red), 13 fibromyalgic with moderate depression (1, green) and 6 fibromyalgic with severe depression (2, blue).

**Figure S3.** ROC curve of biomarker. The sensitivity is on the y-axis, and the specificity is on the x-axis. The area-under-the-curve (AUC) is in blue. On the right: Box-plot of the concentrations of the selected feature between fibromyalgic patients with moderate depression (1) and fibromyalgic patients with severe depression (2) within the dataset. A horizontal line is in red indicating the optimal cutoff.

**Table S1.** Important features identified by Fold Change and logarithmic Fold Change (log2(FC)) parameters calculated.

| Compounds             | Fold Change | log2(FC) |
|-----------------------|-------------|----------|
| D-Glucose             | 9491        | 13.212   |
| Hypoxanthine          | 0.018267    | -5.7746  |
| Acetic acid           | 0.043038    | -4.5382  |
| 2-Hydroxybutyrate     | 0.05329     | -4.23    |
| Formic acid           | 0.078331    | -3.6743  |
| Creatinine            | 0.083113    | -3.5888  |
| Betaine               | 0.11026     | -3.181   |
| Pyruvic acid          | 0.12985     | -2.9451  |
| L-Arginine            | 0.15953     | -2.6481  |
| Citric acid           | 0.17055     | -2.5518  |
| Acetone               | 0.1726      | -2.5345  |
| Lysine                | 0.17357     | -2.5264  |
| L-Carnitine           | 0.19325     | -2.3715  |
| Succinic acid         | 0.21386     | -2.2252  |
| L-Tryptophan          | 0.22884     | -2.1276  |
| Creatine              | 0.22977     | -2.1217  |
| L-Threonine           | 4.2693      | 2.094    |
| L-Proline             | 0.25091     | -1.9948  |
| Choline               | 0.25796     | -1.9548  |
| L-Tyrosine            | 0.29669     | -1.753   |
| L-Glutamine           | 3.3603      | 1.7486   |
| 1-Methylhistidine     | 0.30426     | -1.7166  |
| L-Alanine             | 0.30953     | -1.6919  |
| L-Methionine          | 3.1338      | 1.6479   |
| 3-Hydroxybutyric acid | 0.33956     | -1.5582  |
| L-Lactic acid         | 2.8553      | 1.5137   |
| L-Serine              | 0.35904     | -1.4778  |
| Glycine               | 2.6022      | 1.3797   |
| L-Leucine             | 0.39029     | -1.3574  |
| Isopropanol           | 0.40604     | -1.3003  |
| Isobutyric acid       | 0.41498     | -1.2689  |
| Dimethylsulfone       | 0.41507     | -1.2686  |
| L-Isoleucine          | 0.4163      | -1.2643  |
| L-Phenylalanine       | 0.42085     | -1.2486  |
| Acetoacetate          | 0.44488     | -1.1685  |
| Ethanol               | 0.46156     | -1.1154  |
| L-Asparagine          | 0.47853     | -1.0633  |

**Table S2.** Important features identified by t-tests values, p-values (Threshold <0.05), logarithmic p-values and False Discovery Rate (FDR) parameters calculated for the most statistically significative compounds.

| Compounds             | t.stat  | p value    | -log10(p) | FDR        |
|-----------------------|---------|------------|-----------|------------|
| D-Glucose             | 23.886  | 2.4297e-32 | 31.614    | 1.0691e-30 |
| 2-Hydroxybutyrate     | -19.618 | 8.6876e-28 | 27.061    | 1.9113e-26 |
| Citric acid           | -17.021 | 1.2113e-24 | 23.917    | 1.7765e-23 |
| L-Tryptophan          | -14.386 | 4.1261e-21 | 20.384    | 4.5387e-20 |
| L-Carnitine           | -11.442 | 1.0219e-16 | 15.991    | 8.9929e-16 |
| 1-Methylhistidine     | -11.266 | 1.9364e-16 | 15.713    | 1.42e-15   |
| Creatinine            | -10.755 | 1.2631e-15 | 14.899    | 7.9393e-15 |
| Hypoxanthine          | -10.693 | 1.5935e-15 | 14.798    | 8.7645e-15 |
| L-Proline             | -10.495 | 3.3239e-15 | 14.478    | 1.625e-14  |
| L-Isoleucine          | -9.9348 | 2.7364e-14 | 13.563    | 1.204e-13  |
| Creatine              | -9.7799 | 4.9305e-14 | 13.307    | 1.9722e-13 |
| L-Leucine             | -9.2732 | 3.4344e-13 | 12.464    | 1.2593e-12 |
| Formic acid           | -8.499  | 6.9344e-12 | 11.159    | 2.347e-11  |
| Betaine               | -8.3485 | 1.2492e-11 | 10.903    | 3.9259e-11 |
| Pyruvic acid          | -8.3233 | 1.3787e-11 | 10.861    | 4.0442e-11 |
| Acetic acid           | -8.2342 | 1.955e-11  | 10.709    | 5.3764e-11 |
| L-Threonine           | 8.1348  | 2.8861e-11 | 10.54     | 7.47e-11   |
| L-Phenylalanine       | -8.0818 | 3.5545e-11 | 10.449    | 8.6889e-11 |
| L-Methionine          | 7.8233  | 9.8121e-11 | 10.008    | 2.2723e-10 |
| Choline               | -7.7509 | 1.3046e-10 | 9.8845    | 2.8702e-10 |
| Succinic acid         | -7.4395 | 4.4429e-10 | 9.3523    | 9.3089e-10 |
| L-Arginine            | -7.0983 | 1.7004e-09 | 8.7694    | 3.4009e-09 |
| Lysine                | -5.9093 | 1.7409e-07 | 6.7592    | 3.3304e-07 |
| L-Tyrosine            | -5.8268 | 2.3874e-07 | 6.6221    | 4.3768e-07 |
| Acetone               | -5.6939 | 3.9621e-07 | 6.4021    | 6.9733e-07 |
| 3-Hydroxybutyric acid | -5.5916 | 5.8399e-07 | 6.2336    | 9.883e-07  |
| Isobutyric acid       | -5.531  | 7.3428e-07 | 6.1341    | 1.1966e-06 |
| L-Alanine             | -4.5076 | 3.0967e-05 | 4.5091    | 4.8663e-05 |
| L-Glutamine           | 4.4109  | 4.343e-05  | 4.3622    | 6.5894e-05 |
| Methanol              | -3.7052 | 0.0004623  | 3.3351    | 0.00066364 |
| L-Valine              | -3.7017 | 0.00046756 | 3.3302    | 0.00066364 |
| Acetoacetate          | -3.4081 | 0.0011739  | 2.9304    | 0.0016142  |
| L-Asparagine          | -3.3644 | 0.0013414  | 2.8724    | 0.0017886  |
| Isopropanol           | -3.2656 | 0.0018076  | 2.7429    | 0.0023393  |
| L-Serine              | -3.2086 | 0.0021422  | 2.6691    | 0.0026931  |
| L-Glutamic acid       | -2.9805 | 0.0041511  | 2.3818    | 0.0050736  |
| Glycine               | 2.8752  | 0.0055804  | 2.2533    | 0.0066362  |
| L-Aspartic acid       | -2.6556 | 0.010125   | 1.9946    | 0.011724   |

**Table S3.** PLS-DA classification of the five different components (comps) based on accuracy, R2, Q2 related to MVA analysis between fibromyalgic patient and controls derived by NMR analysis.

|          | Comp1 | Comp2 | Comp3 | Comp4 | Comp5 |
|----------|-------|-------|-------|-------|-------|
| Accuracy | 1.0   | 1.0   | 1.0   | 1.0   | 1.0   |
| R2       | 0.94  | 0.98  | 0.98  | 0.99  | 0.98  |
| Q2       | 0.93  | 0.95  | 0.95  | 0.93  | 0.92  |

**Table S4.** PLS-DA classification of the five different components (comps) based on accuracy, R2, Q2 related to MVA analysis between healthy controls, patients with moderate depression and patients with severe depression.

|          | Comp1 | Comp2 | Comp3 | Comp4 | Comp5 |
|----------|-------|-------|-------|-------|-------|
| Accuracy | 0.84  | 0.76  | 0.71  | 0.73  | 0.74  |
| R2       | 0.79  | 0.85  | 0.88  | 0.90  | 0.93  |
| Q2       | 0.75  | 0.66  | 0.65  | 0.62  | 0.59  |

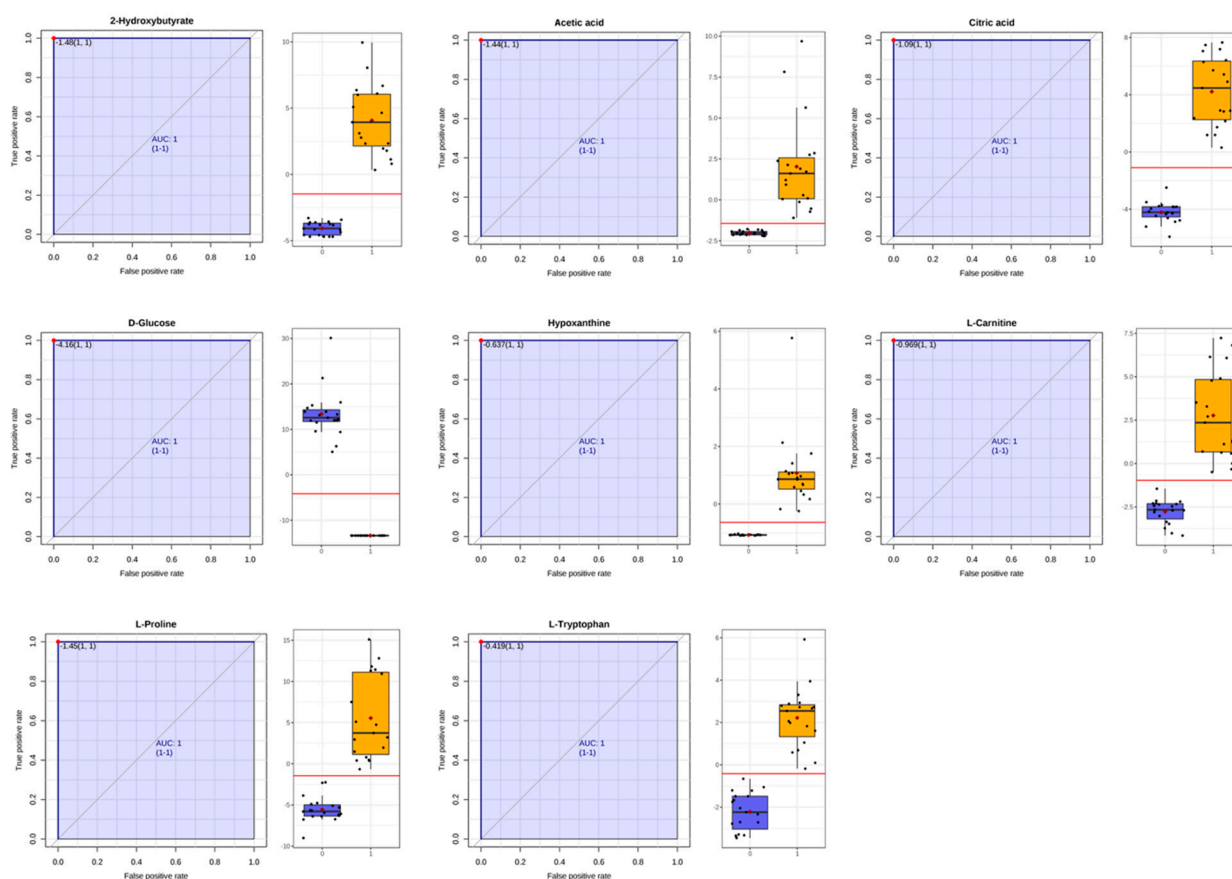**Figure S1.** ROC curve of biomarker. The sensitivity is on the y-axis, and the specificity is on the x-axis. The area-under-the-curve (AUC) is in blue. On the right: Box-plot of the concentrations of the selected feature between controls (0) and fibromyalgic patients (1) within the dataset. A horizontal line is in red indicating the optimal cutoff.

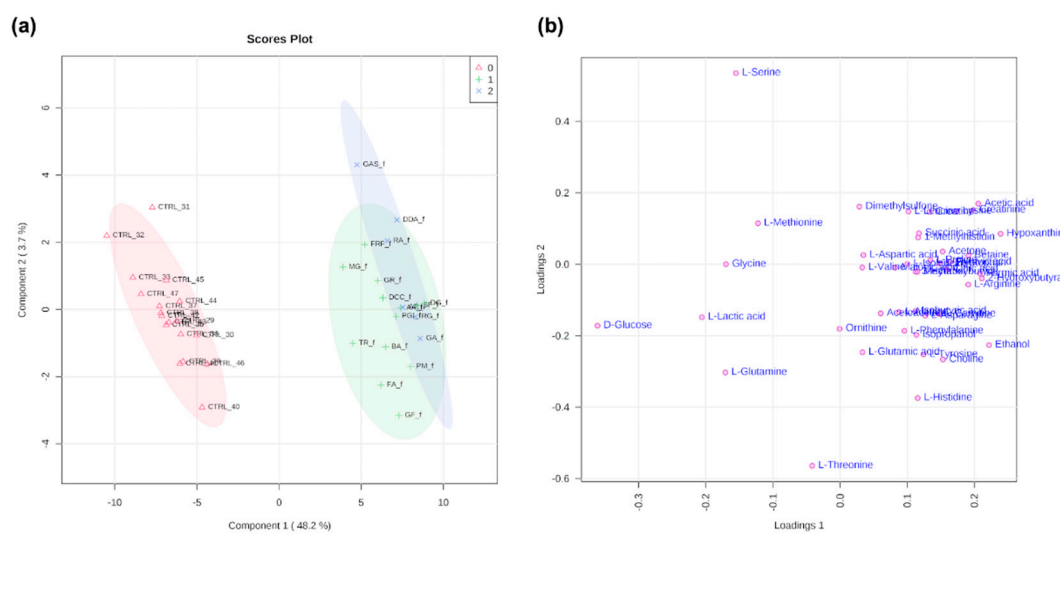

**Figure S2.** PLS-DA score plot (a) and loading plot (b) for  $^1\text{H}$  NMR data collected in CPMG spectra using 19 controls (0, red), 13 fibromyalgic with moderate depression (1, green) and 6 fibromyalgic with severe depression (2, blue).

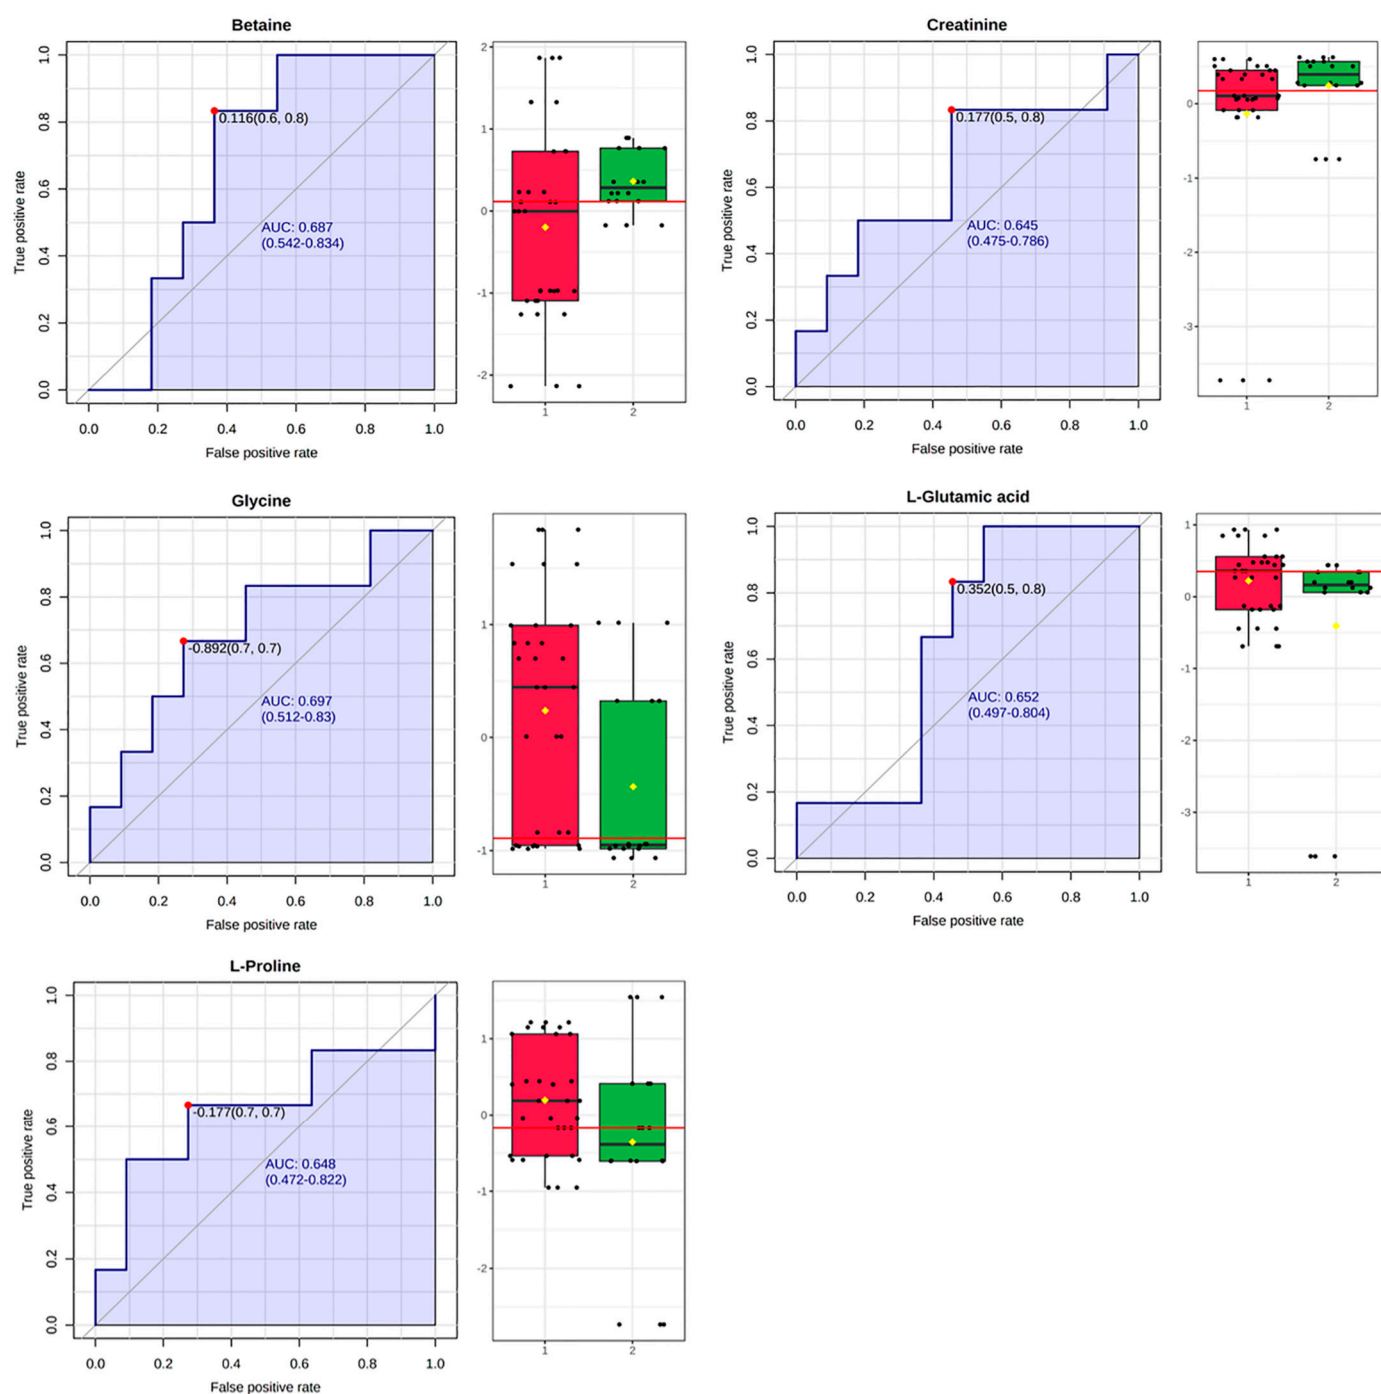

**Figure S3.** ROC curve of biomarker. The sensitivity is on the y-axis, and the specificity is on the x-axis. The area-under-the-curve (AUC) is in blue. On the right: Box-plot of the concentrations of the selected feature between fibromyalgic patients with moderate depression (1) and fibromyalgic patients with severe depression (2) within the dataset. A horizontal line is in red indicating the optimal cutoff.
